# Supplementary material for: Wnt16 signaling promotes osteoblast differentiation of periosteal derived cells in vitro and in vivo
Source: PeerJ journal article supplement (doi:10.7717/peerj.10374), 2020-11-24

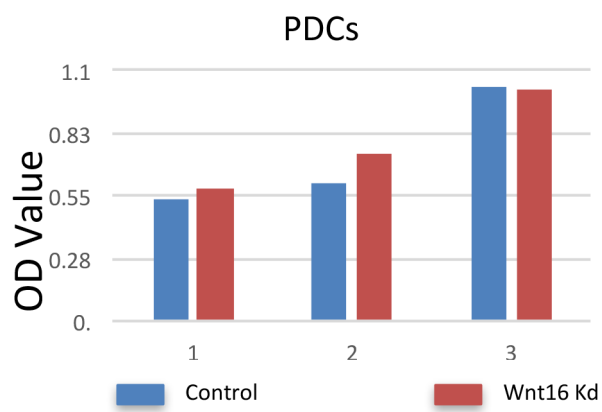

Supplement: suppl,_fig_1.pdf [file suppl%2C_fig_1.pdf]
